# Supplementary material for: Overexpression of Claspin and Timeless protects cancer cells from replication stress in a checkpoint-independent manner
Source: PubMed Central journal article supplement (PMC6385232; doi:10.1038/s41467-019-08886-8), 2019-02-22
Supplement: 41467_2019_8886_MOESM3_ESM.pdf [file 41467_2019_8886_MOESM3_ESM.pdf]

## Reporting Summary

Nature Research wishes to improve the reproducibility of the work that we publish. This form provides structure for consistency and transparency in reporting. For further information on Nature Research policies, see [Authors & Referees](#) and the [Editorial Policy Checklist](#).

### Statistical parameters

When statistical analyses are reported, confirm that the following items are present in the relevant location (e.g. figure legend, table legend, main text, or Methods section).

n/a | Confirmed

- The exact sample size ( $n$ ) for each experimental group/condition, given as a discrete number and unit of measurement
- An indication of whether measurements were taken from distinct samples or whether the same sample was measured repeatedly
- The statistical test(s) used AND whether they are one- or two-sided  
*Only common tests should be described solely by name; describe more complex techniques in the Methods section.*
- A description of all covariates tested
- A description of any assumptions or corrections, such as tests of normality and adjustment for multiple comparisons
- A full description of the statistics including central tendency (e.g. means) or other basic estimates (e.g. regression coefficient) AND variation (e.g. standard deviation) or associated estimates of uncertainty (e.g. confidence intervals)
- For null hypothesis testing, the test statistic (e.g.  $F$ ,  $t$ ,  $r$ ) with confidence intervals, effect sizes, degrees of freedom and  $P$  value noted  
*Give  $P$  values as exact values whenever suitable.*
- For Bayesian analysis, information on the choice of priors and Markov chain Monte Carlo settings
- For hierarchical and complex designs, identification of the appropriate level for tests and full reporting of outcomes
- Estimates of effect sizes (e.g. Cohen's  $d$ , Pearson's  $r$ ), indicating how they were calculated
- Clearly defined error bars  
*State explicitly what error bars represent (e.g. SD, SE, CI)*

*Our web collection on [statistics for biologists](#) may be useful.*

### Software and code

Policy information about [availability of computer code](#)

Data collection

*Provide a description of all commercial, open source and custom code used to collect the data in this study, specifying the version used OR state that no software was used.*

Data analysis

*Provide a description of all commercial, open source and custom code used to analyse the data in this study, specifying the version used OR state that no software was used.*

For manuscripts utilizing custom algorithms or software that are central to the research but not yet described in published literature, software must be made available to editors/reviewers upon request. We strongly encourage code deposition in a community repository (e.g. GitHub). See the Nature Research [guidelines for submitting code & software](#) for further information.

### Data

Policy information about [availability of data](#)

All manuscripts must include a [data availability statement](#). This statement should provide the following information, where applicable:

- Accession codes, unique identifiers, or web links for publicly available datasets
- A list of figures that have associated raw data
- A description of any restrictions on data availability

The datasets generated during and/or analysed during the current study are available in the [NAME] repository, [PERSISTENT WEB LINK TO DATASETS] • The

datasets generated during and/or analysed during the current study are available from the corresponding author on reasonable request. Row data associated to figures 2 to 6 are presented in supplementary data files.

## Field-specific reporting

Please select the best fit for your research. If you are not sure, read the appropriate sections before making your selection.

Life sciences  Behavioural & social sciences  Ecological, evolutionary & environmental sciences

For a reference copy of the document with all sections, see [nature.com/authors/policies/ReportingSummary-flat.pdf](https://www.nature.com/authors/policies/ReportingSummary-flat.pdf)

## Life sciences study design

All studies must disclose on these points even when the disclosure is negative.

|                 |                                                                                                                                                                                            |
|-----------------|--------------------------------------------------------------------------------------------------------------------------------------------------------------------------------------------|
| Sample size     | The sample sizes of different experiments, including DNA fiber spreading and immunofluorescence microscopy, were chosen according to the previous studies published by other laboratories. |
| Data exclusions | No data exclusion                                                                                                                                                                          |
| Replication     | All experiments were reliably reproduced.                                                                                                                                                  |
| Randomization   | The samples (cell lines) were allocated into control and various experimental groups according to the expression of wild-type or claspin/timeless depleted samples.                        |
| Blinding        | Blinded experiments were performed for DNA fiber analyses.                                                                                                                                 |

## Reporting for specific materials, systems and methods

### Materials & experimental systems

- |                                     |                                                                 |
|-------------------------------------|-----------------------------------------------------------------|
| n/a                                 | Involvement in the study                                        |
| <input type="checkbox"/>            | <input checked="" type="checkbox"/> Unique biological materials |
| <input type="checkbox"/>            | <input checked="" type="checkbox"/> Antibodies                  |
| <input type="checkbox"/>            | <input checked="" type="checkbox"/> Eukaryotic cell lines       |
| <input checked="" type="checkbox"/> | <input type="checkbox"/> Palaeontology                          |
| <input checked="" type="checkbox"/> | <input type="checkbox"/> Animals and other organisms            |
| <input checked="" type="checkbox"/> | <input type="checkbox"/> Human research participants            |

### Methods

- |                                     |                                                    |
|-------------------------------------|----------------------------------------------------|
| n/a                                 | Involvement in the study                           |
| <input checked="" type="checkbox"/> | <input type="checkbox"/> ChIP-seq                  |
| <input type="checkbox"/>            | <input checked="" type="checkbox"/> Flow cytometry |
| <input checked="" type="checkbox"/> | <input type="checkbox"/> MRI-based neuroimaging    |

## Unique biological materials

Policy information about [availability of materials](#)

Obtaining unique materials

## Antibodies

Antibodies used

The source and the dilution for all antibodies used in this study are included in the manuscript in Methods.

Antibodies used in human cells-  
Antibody Catalog No. Dilution  
Mouse anti-BrdU clone B44 347580, BD Biosciences 1/100  
Rat anti-BrdU clone BU1/75 ABC117-7513, Eurobio Abcys 1/100  
anti-BrdU for ssDNA foci 347580, BD Biosciences 1/20  
anti-ssDNA MAB3868, Millipore 1/250  
anti-pCHK1 (S345) 2348, Cell signaling 1/1000  
Phospho-Chk1 (Ser317) Cell Signaling/ozyme, 2344S 1/1000  
anti-g-H2AX (S139) 05-636, Millipore 1/1000  
anti-actin A4700, Sigma 1/500  
anti-RPA1 Ab79398, abcam 1/300  
anti-claspin (Halazonetis lab gift) 1/50  
anti-Timeless interchim, CK-1290 1/2000

anti-ATR abcam, ab-10312 1/2000  
 anti-Rad17 MBL, K0120-03 1/1000  
 anti-Rad9 santa cruz biotechnology, sc-8324 1/1000  
 anti-chk1 Cell Signaling/ozyme, 2360 1/1000  
 anti-cdc25A santa cruz biotechnology,sc-7389 1/500  
 anti-ras BD transduction lab, 610002 1/500  
 Goat anti-rat Alexa 488 Molecular Probes, A11006 1/100  
 Goat anti-mouse IgG1Alexa 546 Molecular Probes, A21123 1/100  
 Goat anti-Mouse IgG2a Alexa 647 Molecular Probes, A21241 1/50

## Validation

*Describe the validation of each primary antibody for the species and application, noting any validation statements on the manufacturer's website, relevant citations, antibody profiles in online databases, or data provided in the manuscript.*

## Eukaryotic cell lines

### Policy information about [cell lines](#)

## Cell line source(s)

The human HCT116 colorectal carcinoma cell line was provided by A. Coquelle (IRCM, Montpellier, France). Normal human fibroblasts IMR90 and BJ-hTERT were a gift of J-M Lemaitre (IGF, Montpellier, France). MCF7 breast cancer cells were provided M. Piechaczyk (IGMM, Montpellier, France). HeLa cervical cancer cells and U2OS cells were a gift of M. Benkirane (IGH, France),

## Authentication

None of the cell line used have been authenticated

## Mycoplasma contamination

All the cell lines are mycoplasma-free. They have been tested for mycoplasma contamination regularly using MycoAlert Mycoplasma Detection Kit (LONZA).

Commonly misidentified lines  
(See [ICLAC](#) register)

No commonly misidentified cell lines were used in the study.

## Flow Cytometry

### Plots

## Confirm that:

- The axis labels state the marker and fluorochrome used (e.g. CD4-FITC).
- The axis scales are clearly visible. Include numbers along axes only for bottom left plot of group (a 'group' is an analysis of identical markers).
- All plots are contour plots with outliers or pseudocolor plots.
- A numerical value for number of cells or percentage (with statistics) is provided.

### Methodology

## Sample preparation

Cells were fixed in ethanol and stained with DAPI prior to cell sorting.  
 For S phase progression, cells were labelled with EdU, fixed and permeabilized. After Click-it reaction, cells were proceeded to DAPI staining and RNase A treatment before FACS analysis.

## Instrument

For cell sorting, FACS Aria  
 For S phase progression, Miltenyi MACSQuant

## Software

FlowJo

## Cell population abundance

For cell sorting, 20 millions cells were collected.  
 For S phase progression, 100,000 cells were analyzed.

## Gating strategy

Cells were gated first with SSC and FSC. then single cell population was further gated for cell cycle analyses.

- Tick this box to confirm that a figure exemplifying the gating strategy is provided in the Supplementary Information.
